# Supplementary material for: Housing for People with an Acquired Brain or Spinal Injury: Mapping the Australian Funding Landscape
Source: MDPI journal article supplement (doi:10.3390/ijerph16162822), 2019-08-07
Supplement: s2 [file s2]

# Housing for People with an Acquired Brain or Spinal Injury: Mapping the Australian Funding Landscape

## Appendices

### Appendix A: Overview of Major Australian Funding Schemes

#### National Schemes

At a national level, the National Disability Insurance Scheme (NDIS), administered by the National Disability Insurance Agency (NDIA), provides lifetime support for eligible Australian residents under the age of 65 years with permanent disabilities, their families and their carers.

Several national workers compensation schemes also exist. Seacare, which is overseen by the Seafarers Safety, Rehabilitation and Compensation Authority, provides workers compensation to seafaring employees and appropriate third parties<sup>1</sup>. Comcare is a no-fault workers compensation scheme that provides a range of payments and supports to eligible employees of the Commonwealth Government agencies and statutory authorities, the ACT government and corporations or authorities who have been granted a licence to self-insure<sup>2</sup>. Current or former members of the Australian Defence Force with injuries caused by their military service may also be eligible for compensation under the Military Rehabilitation and Compensation Act 2004, including income payment for periods in which they are unable to work, payments for medical treatments and rehabilitation, and permanent impairment compensation<sup>3</sup>.

#### State/Territory-based Schemes

##### *Queensland*

In Queensland, people who sustain a serious injury in a motor vehicle accident may be eligible to receive necessary and reasonable lifetime treatment, care and support under the National Injury Insurance Scheme Queensland (NIISQ), which is implemented by the National Injury Insurance Agency Queensland<sup>4</sup>. This no-fault scheme complements the existing Compulsory Third Party (CTP) scheme, providing support to people who may not have been eligible for support previously under the fault-based CTP scheme. People who sustain a serious injury resulting from a motor vehicle accident who are eligible to make a claim through the CTP scheme may receive compensation for general damages such as pain and suffering or economic loss, in addition to lifetime treatment, care and support through the NIISQ<sup>5,6</sup>. The Queensland workers compensation scheme, WorkCover Queensland, will also engage the National Injury Insurance Agency Queensland to manage the treatment and support of eligible people who sustain serious injuries resulting from a workplace accident<sup>7</sup>.

##### *New South Wales*

In New South Wales, the Lifetime Care and Support Authority (part of icare) is responsible for administering the no-fault Lifetime Care and Support Scheme, which funds treatment, rehabilitation and care for people who have sustained a severe injury as a result of a motor vehicle accident or workplace accident in New South Wales<sup>8</sup>. Under the CTP scheme, people may be eligible for income and medical benefits regardless of fault, and people with serious injuries may also be eligible to claim compensation for economic or non-economic loss if they are able to prove that someone else was responsible for the accident that caused their injury<sup>9</sup>. Icare also provides workers insurance, and those who sustain severe injuries in the workplace may be eligible to receive payments through the icare Workers Care program<sup>10</sup>.

### *Australian Capital Territory (ACT)*

In the ACT, people who sustain a catastrophic injury as a result of a motor vehicle accident or workplace accident may be eligible for the ACT Lifetime Care and Support Scheme<sup>11</sup>. This is a no-fault insurance scheme that provides eligible participants with long-term care and support. People seriously injured from a workplace accident may also be eligible for workers compensation for economic or non-economic loss, not including future medical expenses or support, which would be covered by the Lifetime Care and Support Scheme<sup>12</sup>. Similarly, individuals injured in a motor vehicle accident and able to provide evidence that another person was at fault may be able to make a CTP claim for compensation for economic loss (e.g. lost wages) and non-economic loss (e.g. pain and suffering)<sup>13</sup>.

### *Victoria*

In Victoria, the Transport Accident Commission is responsible for the no-fault Transport Accident Compensation Scheme, which covers long-term services and supports for people who have sustained serious injuries<sup>14</sup>. Through the workers compensation scheme, WorkSafe Victoria, people who are seriously injured in workplace accidents may be eligible to receive payments for lost wages and superannuation, expenses for treatment related to their injury, permanent impairment benefits and may be able to claim for damages from their employer<sup>15,16</sup>.

### *Tasmania*

In Tasmania, people who have been seriously injured in a motor vehicle accident may be eligible to receive treatment and support, including long-term care, through the no-fault Motor Accident Insurance Scheme administered by the Motor Accidents Insurance Board<sup>17</sup>. Through WorkSafe Tasmania, people who are seriously injured in a workplace accident (regardless of fault) may be entitled to receive weekly payments while unable to work, compensation for necessary and reasonable medical, rehabilitation and other expenses related to their injury, lump sum compensation for permanent impairment, and depending on fault may seek common law damages<sup>18</sup>.

### *Northern Territory*

In the Northern Territory, the Motor Accidents Compensation Scheme is a no-fault insurance scheme that provides a range of treatment and support for eligible people injured in motor vehicle accidents<sup>19</sup>. People who are injured in a workplace accident may be entitled to compensation for weekly payments while unable to work, reasonable hospital, medical and rehabilitation treatment, and payments for permanent impairments<sup>20</sup>.

### *South Australia*

South Australia's no-fault Lifetime Support Scheme, administered by Lifetime Support Authority, provides treatment, care and support across the lifetime to individuals who sustain serious injuries as a result of a motor vehicle accident<sup>21</sup>. Adults injured in a motor vehicle accident may be eligible for compensation through the CTP scheme if they are able to prove that their injuries are the fault of another driver<sup>22</sup>. For people who are under the age of 16 when the injury occurs, compensation is available through the CTP scheme for treatment, care and support regardless of fault. ReturntoWork SA manages workers compensation claims in South Australia, providing income support and lifetime care and support for people who are seriously injured in a work accident<sup>23</sup>.

*Western Australia*

In Western Australia, the Insurance Commission of Western Australia manages both the Catastrophic Injuries Support Scheme and the CTP scheme, which both provide lifetime care and support to eligible people who are injured in a motor vehicle accident<sup>24</sup>. However, the CTP scheme is fault-based, so only people who can prove the fault of another driver are eligible for support through this scheme. Individuals must be unable to claim in the CTP scheme to be considered eligible for the Catastrophic Injuries Support Scheme.

Compensation for economic or non-economic loss may also be claimed through the CTP scheme. Those seriously injured at work may be eligible for workers compensation through WorkCover WA, including compensation for loss of wages, reasonable medical, allied health treatment and workplace rehabilitation expenses, and some travel expenses related to the injury treatment<sup>25</sup>.

**Funding Acknowledgements:** This work was supported by the Motor Accident Insurance Commission (MAIC) in Queensland and instigated by the National Injury Insurance Scheme Queensland Agency (NIISQ-A). MAIC and NIISQ-A have had no involvement in the conduct of this research or the writing of this article.

**Declaration of Interest:** There is no actual or potential conflict of interest that could inappropriately influence, or be perceived to influence, this work.

## References

1. Schulz, A., Northridge, M.E. Social determinants of health: Implications for environmental health promotion. *Health, Education & Behavior* **2004**, 31(4), 455-471. doi:10.1177/1090198104265598
2. Australian Network for Universal Housing Design; RI Australia. *Report on the Progress of the National Dialogue on Universal Housing Design 2010–2014*. Authors: Place of Publication Unknown, Australia, **2014**.
3. Commonwealth of Australia. *Community Affairs References Committee: Adequacy of Existing Residential Care Arrangements Available for Young People with Severe Physical, Mental, or Intellectual Disabilities in Australia (Senate Report)*. **2015**. Retrieved from [http://www.aph.gov.au/Parliamentary\\_Business/Committees/Senate/Community\\_Affairs/Young\\_people\\_in\\_aged\\_care/Report](http://www.aph.gov.au/Parliamentary_Business/Committees/Senate/Community_Affairs/Young_people_in_aged_care/Report)
4. Norin, L.; Slaug, B.; Haak, M.; Jørgensen, S.; Lexell, J. Housing accessibility and its associations with participation among older adults living with long-standing spinal cord injury. *The Journal of Spinal Cord Medicine* **2017**, 40(2), 230-240. doi:10.1080/10790268.2016.1224541
5. Hoppestad, B.S. Essential elements for assessment of persons with severe neurological impairments for computer access utilizing assistive technology devices: A Delphi study. *Disability and Rehabilitation* **2006**, 1(1–2), 3-16. doi:10.1080/09638280500167019.
6. MacDonald, S. Assessment of higher level cognitive-communication functions in adolescents with ABI: Standardization of the student version of the functional assessment of verbal reasoning and executive strategies (s-FAVRES). *Brain Injury* **2016**, 30(3), 295–310. doi:10.3109/02699052.2015.1091947
7. Author's Own [details removed for blind review].
8. Australian Institute of Health and Welfare (AIHW). *Housing Assistance in Australia 2015*. **2015**. Retrieved from <http://www.aihw.gov.au/housing-assistance/haa/2015/social-housing-dwellings/>
9. Harrell, R.; Kassner, E.; Figueiredo, C. *Multigenerational Households are Increasing*. AARP Public Policy Institute Fact Sheet. AARP Public Policy Institute: Washington, DC, USA, **2011**.
10. Beer, A.; Faulkner, D. *The Housing Careers of People with a Disability and Carers of People with a Disability*. Australian Housing and Urban Research Institute (AHURI) Research Report. AHURI: Melbourne, Victoria, Australia, **2009**.
11. Cameron, C.; Pirozzo, S.; Tooth, L. Long-term care of people below age 65 with severe acquired brain injury: Appropriateness of aged care facilities. *Health and Health Care* **2001**, 25(3), 261–264. doi:10.1111/j.1467-842X.2001.tb00574.x
12. Foster, M.; Fleming, J.; Tilse, C. Council of Australian Governments' (COAG) initiative for young people with disability in residential aged care: What are the issues for acquired brain injury? *Brain Impairment* **2007**, 8(03), 312–322.
13. Nalder, E.; Fleming, J.; Foster, M.; Cornwell, P.; Shields, C.; Khan, A. Identifying factors associated with perceived success in the transition from hospital to home after

- brain injury. *The Journal of Head Trauma Rehabilitation* **2012**, 27(2), 143–153.  
doi:10.1097/HTR.0b013e3182168fb1
14. Saugeres, L. (Un)accommodating disabilities: Housing, marginalization and dependency in Australia. *Journal of Housing and the Built Environment* **2011**, 26(1), 1-15.  
doi:10.1007/s10901-010-9201-x
  15. Beer, A.; Faulkner, D. *21<sup>st</sup> Century Housing Careers and Australia's Housing Future* (AHURI Final Report No. 128). Australian Housing and Urban Research Institute: Place of publication unknown, Australia. **2009**.
  16. Beer, A.; Faulkner, D. *The Housing Careers of People with a Disability and Carers of People with a Disability*. Australian Housing and Urban Research Institute: Place of publication unknown, Australia. **2009**.
  17. Arksey, H.; O'Malley, L. Scoping studies: Towards a methodological framework. *International Journal of Social Research Methodology* **2005**, 8(1), 19-32.  
doi:10.1080/1364557032000119616
  18. Mahood, Q.; Van Eerd, D.; Irvin, E. Searching for grey literature for systematic reviews: Challenges and benefits. *Research Synthesis Methods* **2014**, 5(3), 221-234, p. 221.  
doi:10.1002/jrsm.1106
  19. Workers Compensation Act 1987, No. 70 (NSW). Retrieved from  
<https://www.legislation.nsw.gov.au/#/view/act/1987/70/part3/div3/sec59>
  20. Return to Work Act 2016 (NT). Retrieved from  
<https://legislation.nt.gov.au/en/Legislation/RETURN-TO-WORK-ACT>
  21. Workers Compensation Act 1951 (ACT). Retrieved from  
<http://www.legislation.act.gov.au/a/1951-2/current/pdf/1951-2.pdf>
  22. Lifetime Care and Support Authority. *Lifetime Care and Support Guidelines*. **2015**. Retrieved from <https://www.icare.nsw.gov.au/-/media/abe21f0f0d214217bdd8ac28a945ee52.ashx?la=en&hash=D72700730944966506AEEEF41782FA2ABD95BF99>
  23. ACT Government. *Welcome to the Lifetime Care and Support Scheme*. **n.d.** Retrieved from [https://apps.treasury.act.gov.au/\\_data/assets/pdf\\_file/0010/787843/Information-Sheet-Welcome-to-LTCSS-PO1.pdf](https://apps.treasury.act.gov.au/_data/assets/pdf_file/0010/787843/Information-Sheet-Welcome-to-LTCSS-PO1.pdf)
  24. Transport Accident Commission. *Home Modifications*. **n.d.** Retrieved from <https://www.tac.vic.gov.au/clients/what-we-can-pay-for/services/home-modifications>
  25. Motor Accident Insurance Board. *Managing at Home*. **2016**. Retrieved from <http://www.maib.tas.gov.au/already-have-a-claim/managing-at-home/>
  26. Motor Accidents (Liabilities and Compensation) Regulations 2010 (Tas). **2012**. Retrieved from <https://www.legislation.tas.gov.au/view/html/inforce/current/sr-2010-017#JS1@HS2@EN>
  27. Australian Government. *Aids, Appliances and Modifications*. **2015**. Retrieved from [http://www.comcare.gov.au/claims\\_and\\_benefits/benefits\\_and\\_entitlements/aids\\_appliances\\_and\\_modifications](http://www.comcare.gov.au/claims_and_benefits/benefits_and_entitlements/aids_appliances_and_modifications)
  28. Australian Government. *Home Modifications*. **n.d.** Retrieved from [https://www.dva.gov.au/sites/default/files/files/health%20and%20wellbeing/homecare/Major\\_Mods\\_External.pdf](https://www.dva.gov.au/sites/default/files/files/health%20and%20wellbeing/homecare/Major_Mods_External.pdf)
  29. National Disability Insurance Agency. *Assistive Technology and Types of Supports*. **n.d.** Retrieved from <https://www.ndis.gov.au/qanda/at-and-types-of-support.html>
  30. National Disability Insurance Agency. *Frequently Asked Questions About Home modifications*. **n.d.** Retrieved from <https://www.ndis.gov.au/medias/documents/h07/h2c/8800160546846/FAQ-Home-modifications-Web-version.pdf>
  31. National Disability Insurance Agency. *Managing Your NDIS Funding Package-*

- Overview*. **2017**. Retrieved from <https://ndis.gov.au/medias/.../Fact-Sheet-Managing-your-NDIS-funding-package.docx>
- 32 National Disability Insurance Agency. *2017/18 NDIS Price Guide: Victoria, New South Wales, Queensland, Tasmania*. **2017**. Retrieved from <https://www.ndis.gov.au/medias/documents/h4a/ha4/8805126078494/201718-VIC-NSW-QLD-TAS-Price-Guide.pdf>
  - 33 National Disability Insurance Agency. *5. Home Modifications*. **n.d.** Retrieved from <https://www.ndis.gov.au/Operational-Guideline/including-5.html>
  - 34 Victorian Workcover Authority. *4. Medical and like services*. **2018**. Retrieved from <http://www1.worksafe.vic.gov.au/vwa/claimsmanual/default.htm>
  - 35 NT Motor Accidents Compensation Commission. *Modification Benefits*. **2017**. Retrieved from <http://www.ntmacc.com.au/Modification.pdf>
  - 36 Motor Accidents (Compensation) Regulations 2010 (NT). **2015**. Retrieved from <https://legislation.nt.gov.au/Legislation/MOTOR-ACCIDENTS-COMPENSATION-REGULATIONS>
  - 37 Australian Government. *RAP National Guidelines*. **2014**. Retrieved from <https://www.dva.gov.au/sites/default/files/files/providers/RAPNationalGuidelines.pdf>
  - 38 Australian Government. *Home/access Modification Assessment Form for All Major Modifications (Bathrooms, Ramps, Lifts, etc...)*. **n.d.** Retrieved from [https://www.dva.gov.au/sites/default/files/files/providers/OT\\_Assess\\_Check.pdf](https://www.dva.gov.au/sites/default/files/files/providers/OT_Assess_Check.pdf)
  - 39 Lifetime Support Authority. *(Lifetime Support Scheme Rules (LSS Rules 02017))*. **2017**. Retrieved from <http://lifetimesupport.sa.gov.au/wp-content/uploads/Final-LSS-Rules.pdf>
  - 40 ACT Government. *Part 14- Home modifications*. **2016**. Retrieved from <https://apps.treasury.act.gov.au/lcscs/lcs-scheme/lcs-guidelines/home-modifications>
  - 41 National Disability Insurance Agency. *Guidance for Home Modifications Assessors*. **2017**. Retrieved from <https://www.ndis.gov.au/medias/documents/h1c/h15/8800093044766/Guidance-for-Home-Modifications-Assessors.pdf>
  - 42 icare. *Request a Home Modification*. **n.d.** Retrieved from <https://www.icare.nsw.gov.au/treatment-and-care/services-and-support/modifications-and-equipment/home-modifications/>
  - 43 Australian Government. *Claim for Alterations to a Place of Residence/Work or Modifications to a Vehicle/Article*. **n.d.** Retrieved from [http://www.comcare.gov.au/data/assets/pdf\\_file/0009/148482/Claim\\_for\\_alterations\\_to\\_a\\_place\\_of\\_residencework\\_or\\_modifications\\_to\\_a\\_vehiclearticle.pdf](http://www.comcare.gov.au/data/assets/pdf_file/0009/148482/Claim_for_alterations_to_a_place_of_residencework_or_modifications_to_a_vehiclearticle.pdf)
  - 44 WorkSafe Victoria. *Equipment and Related Service Policies*. **2017**. Retrieved from <https://www.worksafe.vic.gov.au/health-professionals/fees-and-policies/equipment-and-related-services-policy>
  - 45 Workplace Injury Rehabilitation and Compensation Act 2013, No. 67. **2013**. Retrieved from [http://www.legislation.vic.gov.au/Domino/Web\\_Notes/LDMS/PubStatbook.nsf/51dea49770555ea6ca256da4001b90cd/3629925065cdb2a6ca257c210015979b/\\$FILE/13-067abookmarked.pdf](http://www.legislation.vic.gov.au/Domino/Web_Notes/LDMS/PubStatbook.nsf/51dea49770555ea6ca256da4001b90cd/3629925065cdb2a6ca257c210015979b/$FILE/13-067abookmarked.pdf)
  - 46 Workers' Compensation and Injury Management Act 1981 (WA). **2017**. Retrieved from [https://www.legislation.wa.gov.au/legislation/prod/filestore.nsf/FileURL/mrdoc\\_37390.pdf/\\$FILE/Workers%20Compensation%20And%20Injury%20Management%20Act%201981%20-%20%5B12-a0-01%5D.pdf?OpenElement](https://www.legislation.wa.gov.au/legislation/prod/filestore.nsf/FileURL/mrdoc_37390.pdf/$FILE/Workers%20Compensation%20And%20Injury%20Management%20Act%201981%20-%20%5B12-a0-01%5D.pdf?OpenElement)
  - 47 Workers Rehabilitation and Compensation Act 1988 (Tas). **2018**. Retrieved from <https://www.legislation.tas.gov.au/view/html/inforce/current/act-1988-004#GS74@EN>
  - 48 Seafarers Rehabilitation and Compensation Act 1992, No. 234. **2017**. Retrieved from



- <https://www.legislation.gov.au/Details/C2017C00393>
- 49 Australian Government. *Providers – Rehabilitation Appliances Program [Factsheet HIP72]*. **2016**. Retrieved from <https://www.dva.gov.au/factsheet-hip72-providers-rehabilitation-appliances-program>
  - 50 National Injury Insurance Agency. *Annual Report 2016-17*. **2017**. Retrieved from [https://niis.qld.gov.au/wp-content/uploads/2017/10/17-099\\_NIISQ-Annual-Report-2016-17\\_WEB.pdf](https://niis.qld.gov.au/wp-content/uploads/2017/10/17-099_NIISQ-Annual-Report-2016-17_WEB.pdf)
  - 51 WorkCover Queensland. *Serious Injuries: Case Management and Rehabilitation*. **2008**. Retrieved from [https://www.worksafe.qld.gov.au/\\_data/assets/pdf\\_file/0018/3528/Serious-Injuries-case-management-and-rehabilitation-FS212.pdf](https://www.worksafe.qld.gov.au/_data/assets/pdf_file/0018/3528/Serious-Injuries-case-management-and-rehabilitation-FS212.pdf)
  - 52 icare. *Lifetime Care*. **2018**. Retrieved from <https://www.icare.nsw.gov.au/treatment-and-care/what-we-do/motor-accident-injuries/>
  - 53 icare. *What is the Lifetime Care and Support Scheme?* **2018**. Retrieved from <https://www.icare.nsw.gov.au/-/media/626014ec14e34bc196bc65f9d65b6f33.ashx>
  - 54 icare. *What is Reasonable and Necessary Treatment and Care with Workers Care?* **n.d.** Retrieved from <https://www.icare.nsw.gov.au/-/media/c3fb9f9e787b4fa0bc8592478f00d23d.ashx>
  - 55 icare. *Home Modifications: A way to Stay at Home*. **n.d.** Retrieved from <https://www.icare.nsw.gov.au/-/media/67c792a5a3094d76b27787dc693da3fd.ashx>
  - 56 Transport Accident Commission. *TAC Home Modifications - Client Information Sheet*. **n.d.** Retrieved from <https://www.tac.vic.gov.au/clients/additional-info/archived-content/policy/home-modifications/tac-home-modifications/tac-home-modifications>
  - 57 Lifetime Support Authority. *Home Modifications and Vehicles*. **n.d.** Retrieved from <http://lifetimesupport.sa.gov.au/resources/information-sheets/>
  - 58 Return to Work Act 2014 (SA). **2015**. Retrieved from <https://www.legislation.sa.gov.au/LZ/C/A/RETURN%20TO%20WORK%20ACT%202014/CURRENT/2014.16.AUTH.PDF>
  - 59 National Disability Insurance Agency. *Planning*. **n.d.** Retrieved from <https://ndis.gov.au/operational-guideline/planning.html>
  - 60 icare. *Home Modifications: Frequently Asked Questions*. **n.d.** Retrieved from <https://www.icare.nsw.gov.au/-/media/56b6431309e242adb6c0fcf59ddefacb.ashx>
  - 61 National Disability Insurance Agency. *NDIA Assistive Technology & Consumables Codes Guide*. **2016**. Retrieved from <https://www.ndis.gov.au/medias/documents/hf5/hae/8800885211166/AT-and-consumables-guide.pdf>
  - 62 National Disability Insurance Agency. *NDIS Price Guide: Specialist Disability Accommodation*. **2017**. Retrieved from <https://www.ndis.gov.au/medias/documents/hf8/hdf/8802881994782/SDA-Price-Guide-17-18.pdf>
  - 63 WorkSafe Victoria. *Home Modifications Policy*. **2017**. Retrieved from <https://www.worksafe.vic.gov.au/health-professionals/fees-and-policies/home-modifications-policy>
  - 64 Safe Work Australia. *Comparison of Workers' Compensation Arrangements in Australia and New Zealand* (25th ed). **2017**. Retrieved from <https://www.safeworkaustralia.gov.au/doc/comparison-workers-compensation-arrangements-australia-and-new-zealand-2017>
  - 65 Insurance Commission of Western Australia. *Catastrophic Injuries Support: What am I Covered for?* **2018**. Retrieved from <https://www.icwa.wa.gov.au/catastrophic-injuries-support/what-am-i-covered-for>

- 66 Australian Government. *Aids and Appliances*. **2011**. Retrieved from [http://www.comcare.gov.au/data/assets/pdf\\_file/0015/41145/FS54\\_Aids\\_and\\_Appliances.pdf](http://www.comcare.gov.au/data/assets/pdf_file/0015/41145/FS54_Aids_and_Appliances.pdf)
- 67 WorkCover Queensland. *Other Benefits*. **2016**. Retrieved from <https://www.worksafe.qld.gov.au/rehab-and-claims/support-and-benefits/other-benefits>
- 68 NT Motor Accidents Commission. *Aids and Equipment*. **2017**. Retrieved from <http://www.ntmacc.com.au/AidsEquipment.pdf>
- 69 icare. *What Is 'Reasonable and Necessary' Treatment, Rehabilitation and Care?* **n.d.** Retrieved from <https://www.icare.nsw.gov.au/-/media/aaa55bacaeb24ea9895531447fc3b4f7.ashx>
- 70 icare. *Starting an Attendant Care Program*. **n.d.** <https://www.icare.nsw.gov.au/-/media/ae59da382f004329ab90eb79a4679ef3.ashx>
- 71 ACT Government. *Part 13- Equipment*. **2016**. Retrieved from <https://apps.treasury.act.gov.au/lcass/lcsc-scheme/lcsc-guidelines/equipment>
- 72 Lifetime Support Authority. *Equipment*. **n.d.** Retrieved from <http://lifetimesupport.sa.gov.au/wp-content/uploads/P9.pdf>
- 73 Australian Government. *Best Practice Guide - Claims Management*. **2010**. Retrieved from [http://www.seacare.gov.au/data/assets/pdf\\_file/0015/70044/Seacare\\_Best\\_Practice\\_Guide\\_Claims\\_Management.pdf](http://www.seacare.gov.au/data/assets/pdf_file/0015/70044/Seacare_Best_Practice_Guide_Claims_Management.pdf)
- 74 Lifetime Support Authority. *What is 'Necessary and Reasonable' Treatment, Care and Support?*. **n.d.** Retrieved from <http://lifetimesupport.sa.gov.au/wp-content/uploads/P4.pdf>
- 75 National Disability Insurance Agency. *Your Questions Answered- Getting NDIS Ready and Accessing the NDIS*. **n.d.** Retrieved from <https://www.ndis.gov.au/qanda/managing-plan-participant-information.html>
- 76 National Disability Insurance Scheme. *Choice and Control*. **n.d.** Retrieved from <https://ndis.gov.au/medias/documents/hce/h5b/8799507939358/Factsheet-Choice-and-Control-A4-v0.5.pdf>
- 77 ACT Government. *Part 8- Attendant Care Services*. **2016**. Retrieved from <https://apps.treasury.act.gov.au/lcass/lcsc-scheme/lcsc-guidelines/attendant-care>
- 78 WorkSafe Victoria. *Household Help Fees and Policy*. **2017**. Retrieved from <https://www.worksafe.vic.gov.au/health-professionals/fees-and-policies/household-help-fees-and-policy>
- 79 National Disability Insurance Scheme. *4. Assistive Technology*. **n.d.** Retrieved from <https://www.ndis.gov.au/Operational-Guideline/including-4.html>
- 80 Australian Government. *Essential Medical Equipment Payment [Factsheet CEP03]*. **2016**. Retrieved from <https://www.dva.gov.au/factsheet-cep03-essential-medical-equipment-payment>
- 81 Transport Accident Commission. *Standard Mattresses Information Sheet*. **n.d.** Retrieved from [https://www.tac.vic.gov.au/data/assets/pdf\\_file/0006/171834/TAC0166-Client-Mattress-InfoSheet-PFO\\_WEB.pdf](https://www.tac.vic.gov.au/data/assets/pdf_file/0006/171834/TAC0166-Client-Mattress-InfoSheet-PFO_WEB.pdf)
- 82 Transport Accident Commission. *Transport Accident Commission Equipment List-Aidacare*. **n.d.** Retrieved from [https://www.tac.vic.gov.au/data/assets/pdf\\_file/0019/41545/Equipment-List-External-Aidacare-updated-14-Feb-2018.pdf](https://www.tac.vic.gov.au/data/assets/pdf_file/0019/41545/Equipment-List-External-Aidacare-updated-14-Feb-2018.pdf)
- 83 Transport Accident Commission. *Medical and Rehabilitation Equipment Guidelines*. **n.d.** Retrieved from <https://www.tac.vic.gov.au/providers/working-with-tac-clients/guidelines/provider-guidelines/medical-and-rehabilitation-equipment-guideline#guideline>



- 84 Transport Accident Commission. *Transport Accident Commission Continence, Nutritional Supplements and Wound Care Equipment List*. **n.d.** Retrieved from [https://www.tac.vic.gov.au/\\_data/assets/pdf\\_file/0019/210079/TAC-Equipment-Continence-Wound-Care-Nutrition-Mar-2017-External.pdf](https://www.tac.vic.gov.au/_data/assets/pdf_file/0019/210079/TAC-Equipment-Continence-Wound-Care-Nutrition-Mar-2017-External.pdf)
- 85 WorkSafe Victoria. *Compensation for Treatment Expenses*. **n.d.** Retrieved from <https://www.worksafe.vic.gov.au/claims/compensation/treatment-expenses>
- 86 WorkSafe Victoria. *Home Exercise Equipment Policy*. **2017**. Retrieved from <https://www.worksafe.vic.gov.au/health-professionals/fees-and-policies/home-exercise-equipment-policy>
- 87 ReturntoWorkSA. *Medical Treatment Expenses*. **n.d.** Retrieved from <https://www.rtwsa.com/claims/recovery/treatment-expenses>
- 88 Australian Government. *FAQ- Aids and Appliances*. **2015**. Retrieved from [http://www.comcare.gov.au/\\_data/assets/pdf\\_file/0004/154606/FAQs\\_-\\_Aids\\_and\\_Appliances.pdf](http://www.comcare.gov.au/_data/assets/pdf_file/0004/154606/FAQs_-_Aids_and_Appliances.pdf)
- 89 Transport Accident Commission. *Basic Equipment and Medical Aids*. **n.d.** Retrieved from <https://www.tac.vic.gov.au/clients/what-we-can-pay-for/services/medical-and-rehabilitation-equipment>
- 90 National Disability Insurance Agency. *In-kind Home Ventilation Services (Attendant Care) in NSW - Participant & Support Coordinator Frequently Asked Questions*. **2017**. Retrieved from <https://www.ndis.gov.au/medias/documents/nsw-home-ventilation-pdf/Home-Ventilation-Program-NSW-FAQs.pdf>
- 91 National Disability Insurance Agency. *Managing Your AT Supports*. **n.d.** Retrieved from <https://www.ndis.gov.au/participants/at/managing-at-supports.html>
- 92 ACT Government. *Part 7- Treatment and Rehabilitation Services*. **2016**. Retrieved from <https://apps.treasury.act.gov.au/lcass/lcsc-scheme/lcsc-guidelines/treatment-and-rehabilitation-needs>
- 93 Australian Government. *Veterans' Home Care [Factsheet HCS01]*. **2017**. Retrieved from <https://www.dva.gov.au/factsheet-hcs01-veterans-home-care>
- 94 Transport Accident Commission. *Information for TAC Clients Living in Bushfire Risk Areas*. **2009**. Retrieved from <https://www.tac.vic.gov.au/clients/forms-and-brochures-clients/information-brochures/information-products-for-tac-clients/information-for-tac-clients-living-in-bushfire-risk-areas/Information-for-TAC-clients-living-in-bushfire-risk-areas.pdf>
- 95 Enable NSW; Lifetime Care & Support Authority. *Goals Checklist*. **n.d.** Retrieved from <https://www.icare.nsw.gov.au/-/media/f19e7d3b66764697b190f73a5f3ebbe1.ashx>
- 96 Australian Government. *Motor Vehicle Compensation Scheme (MVCS) [Factsheet HSV59]*. **2017**. Retrieved from <https://www.dva.gov.au/factsheet-mrc10-motor-vehicle-compensation-scheme-mvcs>
- 97 ACT Government. *Part 12- Modifications to a Motor Vehicle*. **2016**. Retrieved from <https://apps.treasury.act.gov.au/lcass/lcsc-scheme/lcsc-guidelines/modifications-to-a-motor-vehicle>
- 98 Transport Accident Commission. *Driving and Vehicle Modifications*. **n.d.** Retrieved from <https://www.tac.vic.gov.au/clients/what-we-can-pay-for/services/driving-and-vehicle-modifications>
- 99 National Disability Insurance Agency. *7. Vehicle Modifications*. **n.d.** Retrieved from <https://www.ndis.gov.au/Operational-Guideline/including-7.html>
- 100 Transport Accident Commission. *TAC Vehicle Modifications*. **n.d.** Retrieved from [https://www.tac.vic.gov.au/\\_data/assets/pdf\\_file/0010/27775/TAC0155-InfoSheet-VehicleModifications\\_PFO\\_WEB2vma.pdf](https://www.tac.vic.gov.au/_data/assets/pdf_file/0010/27775/TAC0155-InfoSheet-VehicleModifications_PFO_WEB2vma.pdf)
- 101 Australian Government. *Factsheet MRC10 – Motor Vehicle Compensation Scheme*

- (MVCS). **2017**. Retrieved from <https://www.dva.gov.au/factsheet-mrc10-motor-vehicle-compensation-scheme-mvcs>
- 102 NSW Government. *Workers Compensation Act 1987 No 70*. **2018**. Retrieved from <https://www.legislation.nsw.gov.au/#/view/act/1987/70/part3/div3/sec59>
- 103 WorkSafe Victoria. *Attendant Care Fees and Policy*. **2017**. Retrieved from <https://www.worksafe.vic.gov.au/health-professionals/fees-and-policies/attendant-care-fees-and-policy>
- 104 Motor Accidents Insurance Board. *What is the MAIB?* **2016**. Retrieved from <http://www.maib.tas.gov.au/about-maib/what-is-the-maib/>
- 105 Motor Accidents Insurance Board. *Tasmania's Motor Accident Insurance Board*. **2015**. Retrieved from <http://www.maib.tas.gov.au/wp-content/uploads/2016/09/Brochure-MAIB.pdf>
- 106 Transport Accident Commission. *Assisted Living Accommodation*. **n.d.** Retrieved from <https://www.tac.vic.gov.au/clients/what-we-can-pay-for/services/assisted-living-accommodation>
- 107 WorkSafe Victoria. *Supported Accommodation Policy*. **2017**. Retrieved from <https://www.worksafe.vic.gov.au/health-professionals/fees-and-policies/supported-accommodation-fees-and-policy>
- 108 National Disability Insurance Agency. *National Disability Insurance Scheme (Specialist Disability Accommodation) Rules 2016*. (Aus). **n.d.** Retrieved from <https://www.legislation.gov.au/Details/F2017L00209>
- 109 National Disability Insurance Agency. *Specialist Disability Accommodation Provider and Investor Brief*. **2018**. Retrieved from <https://www.ndis.gov.au/medias/documents/hf8/hdf/8802881994782/SDA-Price-Guide-17-18.pdf>
- 110 Transport Accident Commission. *Choosing a Supported Accommodation Service*. **2011**. Retrieved from <https://www.tac.vic.gov.au/clients/what-we-can-pay-for/policies/other/daily-living-expenses/choosing-a-supported-accommodation-service/Choosing-a-supported-accommodation-service.pdf>
- 111 Transport Accident Commission. *Assisted Accommodation Provider Guideline*. **n.d.** Retrieved from <https://www.tac.vic.gov.au/providers/working-with-tac-clients/guidelines/provider-guidelines/assisted-accommodation-provider-guideline#guideline>
- 112 Motor Accidents Insurance Board. *Organisational Overview March 2017*. **2017**. Retrieved from <http://www.maib.tas.gov.au/wp-content/uploads/2017/06/MAIB-Organisational-Overview.pdf>
- 113 Australian Government. *Homelessness - DVA and Ex-service Organisation Support*. **n.d.** Retrieved from <https://www.dva.gov.au/health-and-wellbeing/home-and-care/homelessness-dva-and-ex-service-organisation-support>
- 114 National Disability Insurance Scheme (Supports for Participants) Rules 2013. (Aus). **n.d.** Retrieved from <https://www.legislation.gov.au/Details/F2013L01063>
- 115 National Disability Insurance Agency. *9. Personal Care Supports*. **n.d.** Retrieved from <https://www.ndis.gov.au/Operational-Guideline/including-9.html>
- 116 Victorian WorkCover Authority. *6.2 Impairment Benefits*. **2018**. Retrieved from <http://www1.worksafe.vic.gov.au/vwa/claimsmanual/default.htm>
- 117 WorkSafe Tasmania. *Workers*. **n.d.** Retrieved from <https://www.worksafe.tas.gov.au/compensation/workers>
- 118 NT Motor Accidents Compensation Commission. *Attendant Care Post July 2014*. **n.d.** Retrieved from <http://www.ntmacc.com.au/AttendantCarePost1July.pdf>

- 119 Lifetime Support Authority. *Support, Attendant Care and Domestic Services*. **n.d.** Retrieved from <http://lifetimesupport.sa.gov.au/wp-content/uploads/P7.pdf>
- 120 icare. *Guidance on the Support Needs for Adults with Spinal Cord Injury*. **2017**. Retrieved from <https://www.icare.nsw.gov.au/-/media/a1d6988326004edf8ec6f1cad256e003.ashx>
- 121 Transport Accident Commission. *Post-hospital Support*. **n.d.** Retrieved from [https://www.tac.vic.gov.au/\\_data/assets/pdf\\_file/0015/27150/Post-Hospital-Support\\_2017.pdf](https://www.tac.vic.gov.au/_data/assets/pdf_file/0015/27150/Post-Hospital-Support_2017.pdf)
- 122 Australian Government. *Household Attendant Care Services*. **2014**. Retrieved from [http://www.comcare.gov.au/claims\\_and\\_benefits/benefits\\_and\\_entitlements/care\\_and\\_support\\_services](http://www.comcare.gov.au/claims_and_benefits/benefits_and_entitlements/care_and_support_services)
- 123 Australian Government. *Compensation for Attendant Care Services*. **2017**. Retrieved from [http://www.comcare.gov.au/the\\_scheme/guidance\\_on\\_applying\\_the\\_src\\_act/compensation\\_for\\_attendant\\_care\\_services](http://www.comcare.gov.au/the_scheme/guidance_on_applying_the_src_act/compensation_for_attendant_care_services)
- 124 Australian Government. *Attendant Care [Factsheet MRC41]*. **2018**. Retrieved from <https://www.dva.gov.au/factsheet-mrc41-attendant-care>
- 125 icare. *Attendant and Domestic Care Services*. **n.d.** Retrieved from <https://www.icare.nsw.gov.au/treatment-and-care/services-and-support/attendant-care-and-domestic-services/working-with-an-attendant-care-provider/>
- 126 ACT Government. *Attendant Care*. **2016**. Retrieved from <https://apps.treasury.act.gov.au/lcass/participants-and-carers/attendant-care>
- 127 Transport Accident Commission. *Attendant Care*. **2017**. Retrieved from <https://www.tac.vic.gov.au/clients/what-we-can-pay-for/services/attendant-care#overview>
- 128 Disability Reform Council. *Specialist Disability Accommodation Pricing and Payments Framework*. **2015**. Retrieved from <https://ndis.gov.au/SDA-pricing-payments>
- 129 National Disability Insurance Agency. *Permanent and Significant Disability and Reasonable and Necessary Supports Transcript*. **2016**. Retrieved from <https://www.ndis.gov.au/html/sites/default/files/Reasonable-and-necessary-transcript.pdf>
- 130 Transport Accident Commission. *Support at Home*. **2017**. Retrieved from <https://www.tac.vic.gov.au/clients/what-we-can-pay-for/services/support-at-home>
- 131 Australian Government. *Household Services. (Factsheet MRC42)*. **2018**. Retrieved from <https://www.dva.gov.au/factsheet-mrc42-household-services>
- 132 New South Wales Government. *Getting Workers Compensation Insurance*. **n.d.** Retrieved from <https://www.sira.nsw.gov.au/insurance-coverage/workers-compensation-insurance/getting-workers-compensation-insurance>
- 133 Transport Accident Commission. *Domestic & Gardening Services Guidelines*. **2017**. Retrieved from <https://www.tac.vic.gov.au/providers/working-with-tac-clients/guidelines/provider-guidelines/domestic-And-gardening-services-guidelines#overview>
- 134 Motor Accidents Insurance Board. *Claims Procedures & Scheduled Benefits Payable*. **2013**. Retrieved from <http://www.maib.tas.gov.au/wp-content/uploads/2016/09/Brochure-Claims-Procedures.pdf>
- 135 Australian Government. *National Disability Insurance Scheme Act 2013*. **2013**. Retrieved from <https://www.legislation.gov.au/Details/C2016C00934/Html/Text>
- 136 Australian Government. *Guidance for Occupational Therapists Undertaking Home Assessments*. **n.d.** Retrieved from [http://www.comcare.gov.au/\\_data/assets/pdf\\_file/0015/150432/Guidance\\_for\\_OT\\_undertaking\\_home\\_assessments.pdf](http://www.comcare.gov.au/_data/assets/pdf_file/0015/150432/Guidance_for_OT_undertaking_home_assessments.pdf)

- 137 Australian Government. *Jurisdictional Policy Advice No. 2008/08 - The Provision of Rehabilitation Assistance for Severely Incapacitated Employees to Facilitate Social, Recreational, Community or Disability Related Activities*. **2008**. Retrieved from [http://www.comcare.gov.au/\\_data/assets/pdf\\_file/0018/40428/JPA\\_2008-08\\_Provision\\_of\\_rehabilitation\\_assistance\\_for\\_severely\\_incapacitated\\_employees\\_2v0.pdf](http://www.comcare.gov.au/_data/assets/pdf_file/0018/40428/JPA_2008-08_Provision_of_rehabilitation_assistance_for_severely_incapacitated_employees_2v0.pdf)
- 138 Transport Accident Commission. *Attendant Care Provider Guidelines*. **n.d.** Retrieved from <https://www.tac.vic.gov.au/providers/working-with-tac-clients/guidelines/provider-guidelines/attendant-care-provider-guideline#guideline>
- 139 Transport Accident Commission. *Community Access Support Services*. **n.d.** Retrieved from <https://www.tac.vic.gov.au/clients/what-we-can-pay-for/services/community-access-support-services#payment>
- 140 Transport Accident Commission. *Community Group Program Provider Guidelines*. **2017**. Retrieved from <https://www.tac.vic.gov.au/providers/working-with-tac-clients/guidelines/provider-guidelines/community-group-program-provider-guideline#guideline>
- 141 WorkSafe Victoria. *Community Access Policy*. **2017**. Retrieved from <https://www.worksafe.vic.gov.au/health-professionals/fees-and-policies/community-access-policy>
- 142 Transport Accident Commission. *Supported Leisure Options*. **2003**. Retrieved from <https://www.tac.vic.gov.au/clients/additional-info/archived-content/policy/community-access/supported-leisure-options/Supported-leisure-options.pdf>
- 143 National Disability Insurance Agency. *Participant Transport Funding Information*. **n.d.** Retrieved from <https://www.ndis.gov.au/document/participant-transport-funding-informati.html>
- 144 National Disability Insurance Agency. *12. Transport*. **n.d.** Retrieved from <https://www.ndis.gov.au/Operational-Guideline/including-12.html>
- 145 Australian Government. *Rehabilitation [Factsheet MRC05]*. **2018**. Retrieved from <https://www.dva.gov.au/factsheet-mrc05-rehabilitation>
- 146 Australian Government. *Day-club Programs*. **n.d.** Retrieved from <https://www.dva.gov.au/health-and-wellbeing/day-club-programs>
- 147 Lifetime Support Authority. *Travelling to Appointments for Treatment Services*. **n.d.** Retrieved from <http://lifetimesupport.sa.gov.au/wp-content/uploads/P6.pdf>
- 148 Australian Government. *Veteran and Community Grants Program (Factsheet GS03)*. **2018**. Retrieved from <https://www.dva.gov.au/factsheet-gs03-veteran-and-community-grants-program-vcg>
- 149 National Disability Insurance Agency. *10. Recreation Supports*. **n.d.** Retrieved from <https://www.ndis.gov.au/Operational-Guideline/including-10.html>
- 150 National Disability Insurance Agency. *Community Clubs and Associations*. **n.d.** Retrieved from <https://www.ndis.gov.au/communities/not-profit-community-clubs-and-associati.html>
- 151 Transport Accident Commission. *Community Group Program: Hours Request & Client Plan Notes*. **n.d.** Retrieved from <https://www.tac.vic.gov.au/providers/documents-and-forms/basic-forms/community-group-program-hours-request-form/cgpf10n.doc>
- 152 Motor Accident Insurance Board. *What We Cannot Cover*. **2016**. Retrieved from <http://www.maib.tas.gov.au/already-have-a-claim/what-we-cannot-cover/>
- 153 Transport Accident Commission. *Case Management Guidelines*. **n.d.** Retrieved from <https://www.tac.vic.gov.au/providers/working-with-tac-clients/guidelines/provider-guidelines/case-management-guidelines>



- 154 National Disability Insurance Agency. *Support Coordination: Information for Participants and Providers*. **2017**. Retrieved from <https://ndis.gov.au/medias/documents/hd2/h8c/8803280977950/Fact-sheet-Support-coordination.pdf>
- 155 National Disability Insurance Agency. *About the NDIS*. **n.d.** Retrieved from <https://www.ndis.gov.au/html/sites/default/files/documents/About-us/About-theNDIS.pdf>
- 156 National Disability Insurance Agency. *My NDIS Pathway - Your Guide to Being an NDIS Participant*. **n.d.** Retrieved from <https://www.ndis.gov.au/html/sites/default/files/My-NDIS%20-Pathway.pdf>
- 157 National Disability Insurance Agency. *Overview of the NDIS*. **n.d.** Retrieved from <https://www.ndis.gov.au/operational-guideline/overview.html>
- 158 National Disability Insurance Agency. *Family Support - What the NDIS will Fund*. **n.d.** Retrieved from <https://ndis.gov.au/families-carers/family-supports.html>
- 159 WorkSafe Victoria. *Child Care Service Fees and Policy*. **2017**. Retrieved from <https://www.worksafe.vic.gov.au/health-professionals/fees-and-policies/child-care-services-fees-and-policy>
- 160 Transport Accident Commission. *Child Care Guidelines*. **2017**. Retrieved from <https://www.tac.vic.gov.au/providers/working-with-tac-clients/guidelines/provider-guidelines/child-care-guidelines#overview>
- 161 Transport Accident Commission. *Guide and Assistance Dogs*. **n.d.** Retrieved from <https://www.tac.vic.gov.au/clients/what-we-can-pay-for/services/guide-and-assistance-dogs>
- 162 Australian Government. *Rehabilitation Appliances Program (RAP)*. **n.d.** Retrieved from <https://www.dva.gov.au/health-and-wellbeing/home-and-care/rehabilitation-appliances-program-rap>
- 163 National Disability Insurance Agency. *Assistance Animals*. **n.d.** Retrieved from <https://www.ndis.gov.au/medias/documents/hce/hbb/8799673286686/Assistance-Animal-Guidance-PDF-KB-.pdf>
- 164 Australian Government. *Assistance Dogs*. **n.d.** Retrieved from <https://www.dva.gov.au/health-and-wellbeing/rehabilitation/assistance-dogs>
- 165 ReturntoWorkSA. *Impairment assessments*. **n.d.** Retrieved from <https://www.rtwsa.com/claims/what-is-an-impairment-assessment>
- 166 Anderson, D.; Dumont, S.; Azzaria, L.; Le Bourdais, M.; Noreau, L. Determinants of return to work among spinal cord injury patients: A literature review. *Journal of Vocational Rehabilitation* **2007**, 27(1), 57-68.
- 167 Boschen, K.A.; Tonack, M.; Gargaro, J. Long-term adjustment and community reintegration following spinal cord injury. *International Journal of Rehabilitation Research* **2003**, 26(3), 157-164. doi:10.1097/01.mrr.0000088440.78481.1f
- 168 Valtonen, K.; Karlsson, A.-K.; Alaranta, H.; Viikari-Juntura, E. Work participation among persons with traumatic spinal cord injury and meningomyelocele. *Journal of Rehabilitation Medicine* **2006**, 38(3), 192-200. doi:10.1080/16501970500522739
- 169 Nooijen, C.F.J.; de Groot, S.; Postma, K.; Bergen, M.P.; Stam, H.J.; Bussmann, J.B.J.; van den Berg-Emons, R.J. A more active lifestyle in persons with a recent spinal cord injury benefits physical fitness and health. *Spinal Cord* **2012**, 50(4), 320-323. doi:10.1038/sc.2011.152
- 170 Corrigan, J.D.; Hammond, F.M. Traumatic brain injury as a chronic health condition. *Archives of Physical Medicine and Rehabilitation* **2013**, 94(6), 1199-1201. doi:10.1016/j.apmr.2013.01.023

- 171 Saunders, L.L.; Clarke, A.; Tate, D.G.; Forchheimer, M.; Krause, J.S. Lifetime prevalence of chronic health conditions among persons with spinal cord injury. *Archives of Physical Medicine and Rehabilitation* **2015**, *96*(4), 673-679. doi:10.1016/j.apmr.2014.11.019
- 172 Archer, T.; Svensson, K.; Alrriesson, M. Physical exercise ameliorates deficits induced by traumatic brain injury. *Acta Neurologica Scandinavica* **2012**, *125*(5), 293-302. doi:10.1111/j.1600-0404.2011.01638.x
- 173 Nash, M. S. Exercise as a health-promoting activity following spinal cord injury. *Journal of Neurologic Physical Therapy* **2005**, *29*(2), 87-106. doi:10.1097/01.NPT.0000282514.94093.c6
- 174 Gaither, J.B.; Galson, S.; Curry, M.; Mhayamaguru, M.; Williams, C.; Keim, S.M.; Bobrow, B.J.; Spaite, D.W. Environmental hyperthermia in prehospital patients with major traumatic brain injury. *Journal of Emergency Medicine* **2015**, *49*(3), 375-381. doi:10.1016/j.jemermed.2015.01.038
- 175 Barclay, L.; McDonald, R.; Lentin, P. Social and community participation following spinal cord injury: A critical review. *International Journal of Rehabilitation Research* **2015**, *38*(1), 1-19. doi:10.1097/MRR.0000000000000085
- 176 Bier, N.; Dutil, E.; Couture, M. Factors affecting leisure participation after a traumatic brain injury: An exploratory study. *Journal of Head Trauma Rehabilitation* **2009**, *24*(3), 187-194. doi:10.1097/HTR.0b013e3181a0b15a
- 177 Australian Human Rights Commission. *Assistance Animals and the Disability Discrimination Act 1992 (Cth)*. **2016**. Retrieved from <https://www.humanrights.gov.au/our-work/disability-rights/projects/assistance-animals-and-disability-discrimination-act-1992-cth>
- 178 World Health Organization. [WHO]. *Health Promotion Glossary*. **1998**. WHO: Geneva.
- 179 Cramer, S.C.; Riley, J.D. Neuroplasticity and brain repair after stroke. *Current Opinion in Neurology* **2008**, *21*(1), 76-82. doi:10.1097/WCO.0b013e3282f36cb6
- 180 Alia, C.; Spalletti, C.; Lai, S.; Panarese, A.; Lamola, G.; Bertolucci, F.; Di Garbo, A.; Chisari, C.; Micera, S.; Caleo, M. Neuroplastic changes following brain ischemia and their contribution to stroke recovery: Novel approaches in neurorehabilitation. *Frontiers in Cellular Neuroscience* **2017**, *11*, 76-98. doi:10.3389/fncel.2017.00076
- 181 Khan, F.; Amatya, B.; Galea, M.P.; Gonzenbach, R.; Kesselring, J. *Neurorehabilitation: Applied neuroplasticity* **2017**, *264*(3), 603-615. doi:10.1007/s00415-016-8307-9
- 182 Taub, E. (Ed.). *Frontiers in Human Neuroscience: Neuroplasticity and Neurorehabilitation*. Frontiers Media. **2015**. doi:10.3389/978-2-88919-392-9
- 183 Piradov, M.A.; Chernikova, L.A.; Suponeva, N.A. Brain plasticity and modern neurorehabilitation technologies. *Herald of the Russian Academy of Sciences* **2018**, *88*(2), 111-118. doi:10.1134/S1019331618020065
- 184 Curt, A.; Hubertus, J.A.; Van Hedel, D.K.; Dietz, V. Recovery from a spinal cord injury: Significance of compensation, neural plasticity, and repair. *Journal of Neurotrauma* **2008**, *25*(6), 677-685. doi:10.1089/neu.2007.0468
